# Supplementary material
Source: Springer Nature journal article supplement (https://www.springermedizin.de/resource/supplementary/13643_2012_43_MOESM3_ESM.pdf/9681308)
Supplement: MOESM3 [file 9681308]

Broad review  
question

```
graph TD; A[Broad review question] --> B[Sub-synthesis 1]; A --> C[Sub-synthesis 2]; B --> D[Mixed synthesis]; C --> D;
```

The diagram is a flowchart with four blue rectangular boxes containing white text. At the top is a box labeled 'Broad review question'. A vertical line descends from this box and connects to a horizontal line that branches into two vertical lines, each leading to a box below: 'Sub-synthesis 1' on the left and 'Sub-synthesis 2' on the right. From the bottom-right corner of the 'Sub-synthesis 1' box, an arrow points diagonally down and to the right towards a central box at the bottom labeled 'Mixed synthesis'. Similarly, from the bottom-left corner of the 'Sub-synthesis 2' box, an arrow points diagonally down and to the left towards the same 'Mixed synthesis' box.

Sub-  
synthesis 1

Sub-  
synthesis 2

Mixed  
synthesis
